# Supplementary material for: Beta-caryophyllene enhances wound healing through multiple routes
Source: PubMed Central journal article supplement (PMC6913986; doi:10.1371/journal.pone.0216104), 2019-12-16
Supplement: pone.0216104.s010.pdf [file pone.0216104.s010.pdf]

**S1 Table. Beta-caryophyllene standard (W225207, Sigma-Aldrich)****composition/GC-MS**

| No. in S4<br>Fig. | Rt<br>(min) | Peak area x 10 <sup>6</sup> | Compound                | %     |
|-------------------|-------------|-----------------------------|-------------------------|-------|
| 1                 | 25.11       | 0.831                       | Cubebene                | 0.1   |
| 2                 | 25.75       | 1.379                       | a sesquiterpene, MW 204 | 0.2   |
| 3                 | 26.31       | 5.299                       | Copaene                 | 0.8   |
| 4                 | 27.52       | 3.308                       | a sesquiterpene, MW 204 | 0.5   |
| 5                 | 27.95       | 1.198                       | a sesquiterpene, MW 204 | 0.2   |
| 6                 | 28.21       | 546.676                     | $\beta$ -caryophyllene  | 81.8  |
| 7                 | 28.49       | 1.704                       | a sesquiterpene, MW 204 | 0.3   |
| 8                 | 28.59       | 0.4799                      | a sesquiterpene, MW 204 | 0.1   |
| 9                 | 29.38       | 2.659                       | neoclovene              | 0.4   |
| 10                | 29.63       | 93.877                      | $\alpha$ -caryophyllene | 14.0  |
| 11                | 20.33       | 0.681                       | 9-epi(E)-caryophyllene  | 0.1   |
| 12                | 34.63       | 10.416                      | caryophyllene oxide     | 1.6   |
|                   | SUM         | 668.508                     |                         | 100.0 |
