# Supplementary material for: Beta-caryophyllene enhances wound healing through multiple routes
Source: PubMed Central journal article supplement (PMC6913986; doi:10.1371/journal.pone.0216104), 2019-12-16
Supplement: pone.0216104.s011.pdf [file pone.0216104.s011.pdf]

**S2 Table. Olfactory receptor genes in the olfactory epithelium up-regulated after 1 hour exposure to BCP**

| Olfactory Receptor Gene | Log2FC | PValue |
|-------------------------|--------|--------|
| <i>Olfr340</i>          | 4.892  | 0.005  |
| <i>Olfr1480</i>         | 1.881  | 0.028  |
| <i>Olfr103</i>          | 1.656  | 0.001  |
| <i>Olfr1054</i>         | 1.469  | 0.028  |
| <i>Olfr44</i>           | 1.425  | 0.001  |
| <i>Olfr935</i>          | 1.382  | 0.016  |
| <i>Olfr1152</i>         | 1.325  | 0.041  |
| <i>Olfr616</i>          | 1.246  | 0.037  |
| <i>Olfr1356</i>         | 1.138  | 0.035  |
| <i>Olfr508</i>          | 1.124  | 0.048  |
| <i>Olfr111</i>          | 1.066  | 0.021  |
| <i>Olfr1258</i>         | 1.013  | 0.002  |
| <i>Olfr33</i>           | 0.928  | 0.042  |
| <i>Olfr874</i>          | 0.880  | 0.026  |
| <i>Olfr599</i>          | 0.810  | 0.022  |
| <i>Olfr92</i>           | 0.780  | 0.046  |
| <i>Olfr716</i>          | 0.736  | 0.015  |
| <i>Olfr701</i>          | 0.729  | 0.048  |
| <i>Olfr1427</i>         | 0.687  | 0.039  |
