# Supplementary material for: Beta-caryophyllene enhances wound healing through multiple routes
Source: PubMed Central journal article supplement (PMC6913986; doi:10.1371/journal.pone.0216104), 2019-12-16
Supplement: pone.0216104.s012.pdf [file pone.0216104.s012.pdf]

**S3 Table. Olfactory receptors expressed in skin after exposure to BCP,  
compared with Oil group**

| Olfactory receptor genes | Log2FC | Pvalue |
|--------------------------|--------|--------|
| <i>Olfr267</i>           | 2.575  | 0.355  |
| <i>Olfr624</i>           | 1.336  | 0.544  |
| <i>Olfr912</i>           | 0.497  | 0.661  |
| <i>Olfr1396</i>          | 0.378  | 0.796  |
| <i>Olfr1034</i>          | 0.344  | 0.859  |
| <i>Olfr110</i>           | 0.256  | 0.780  |
| <i>Olfr212</i>           | 0.211  | 0.925  |
| <i>Olfr482</i>           | 0.075  | 0.737  |
| <i>Olfr558</i>           | -0.115 | 0.788  |
| <i>Olfr920</i>           | -0.14  | 0.777  |
| <i>Olfr1392</i>          | -0.151 | 0.965  |
| <i>Olfr750</i>           | -0.222 | 0.937  |
| <i>Olfr733</i>           | -0.243 | 0.929  |
| <i>Olfr78</i>            | -0.249 | 0.683  |
| <i>Olfr523</i>           | -0.279 | 0.862  |
| <i>Olfr560</i>           | -0.296 | 0.871  |
| <i>Olfr77</i>            | -0.466 | 0.668  |
| <i>Olfr346</i>           | -0.81  | 0.714  |
| <i>Olfr56</i>            | -0.836 | 0.264  |
| <i>Olfr466</i>           | -0.847 | 0.588  |
| <i>Olfr1378</i>          | -0.853 | 0.636  |
| <i>Olfr92</i>            | -0.883 | 0.604  |
| <i>Olfr1033</i>          | -0.898 | 0.221  |
| <i>Olfr111</i>           | -1.06  | 0.134  |
| <i>Olfr1383</i>          | -1.324 | 0.613  |
| <i>Olfr1388</i>          | -1.376 | 0.451  |
| <i>Olfr433</i>           | -1.806 | 0.405  |
| <i>Olfr1393</i>          | -2.218 | 0.395  |
| <i>Olfr432</i>           | -2.707 | 0.440  |
| <i>Olfr1564</i>          | -2.74  | 0.265  |
